# Supplementary material for: SYK Allelic Loss and the Role of Syk-Regulated Genes in Breast Cancer Survival
Source: PubMed Central journal article supplement (PMC3921124; doi:10.1371/journal.pone.0087610), 2014-02-11

Figure S 1

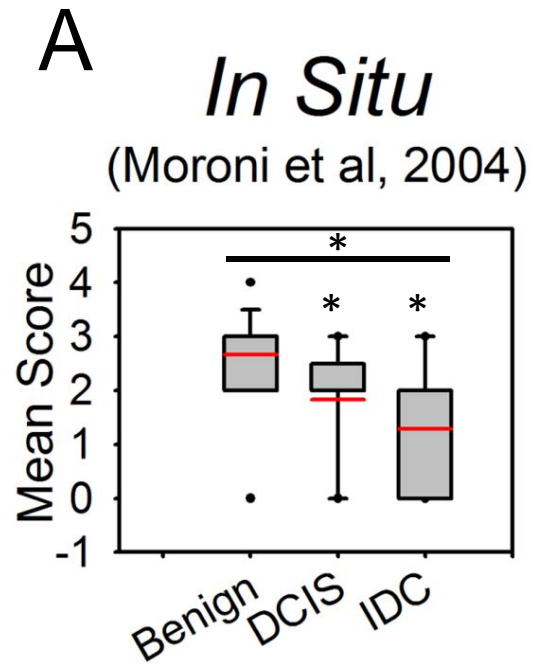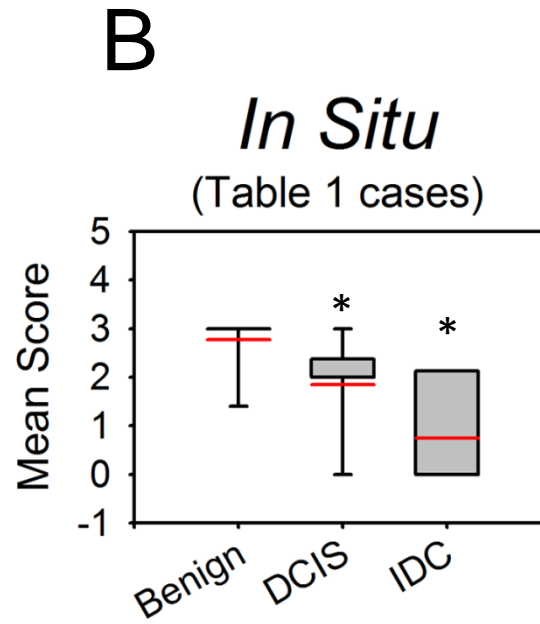

Supplement: pone.0087610.s001.pdf [file pone.0087610.s001.pdf]
