# Supplementary material for: SYK Allelic Loss and the Role of Syk-Regulated Genes in Breast Cancer Survival
Source: PubMed Central journal article supplement (PMC3921124; doi:10.1371/journal.pone.0087610), 2014-02-11

Figure S 2

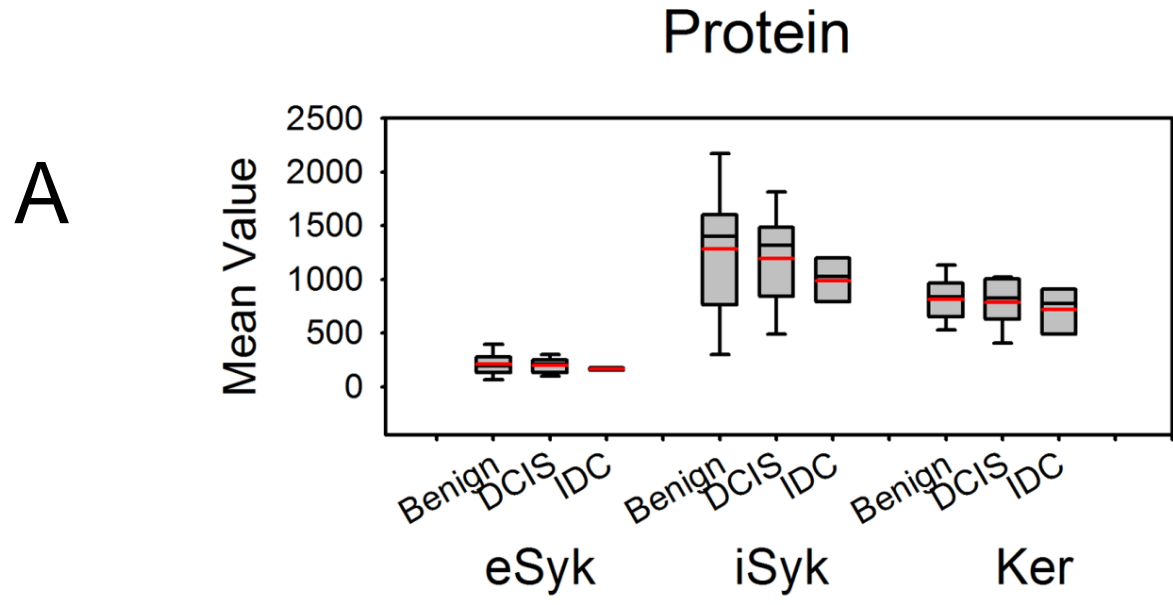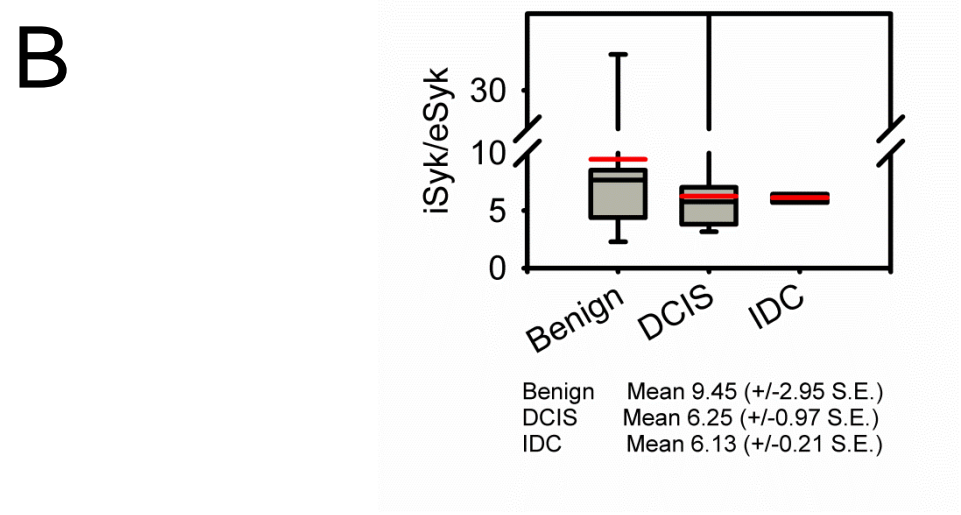

Supplement: pone.0087610.s002.pdf [file pone.0087610.s002.pdf]
