# Supplementary material for: SYK Allelic Loss and the Role of Syk-Regulated Genes in Breast Cancer Survival
Source: PubMed Central journal article supplement (PMC3921124; doi:10.1371/journal.pone.0087610), 2014-02-11
Supplement: pone.0087610.s003.pdf [file pone.0087610.s003.pdf]

Figure S 3

A

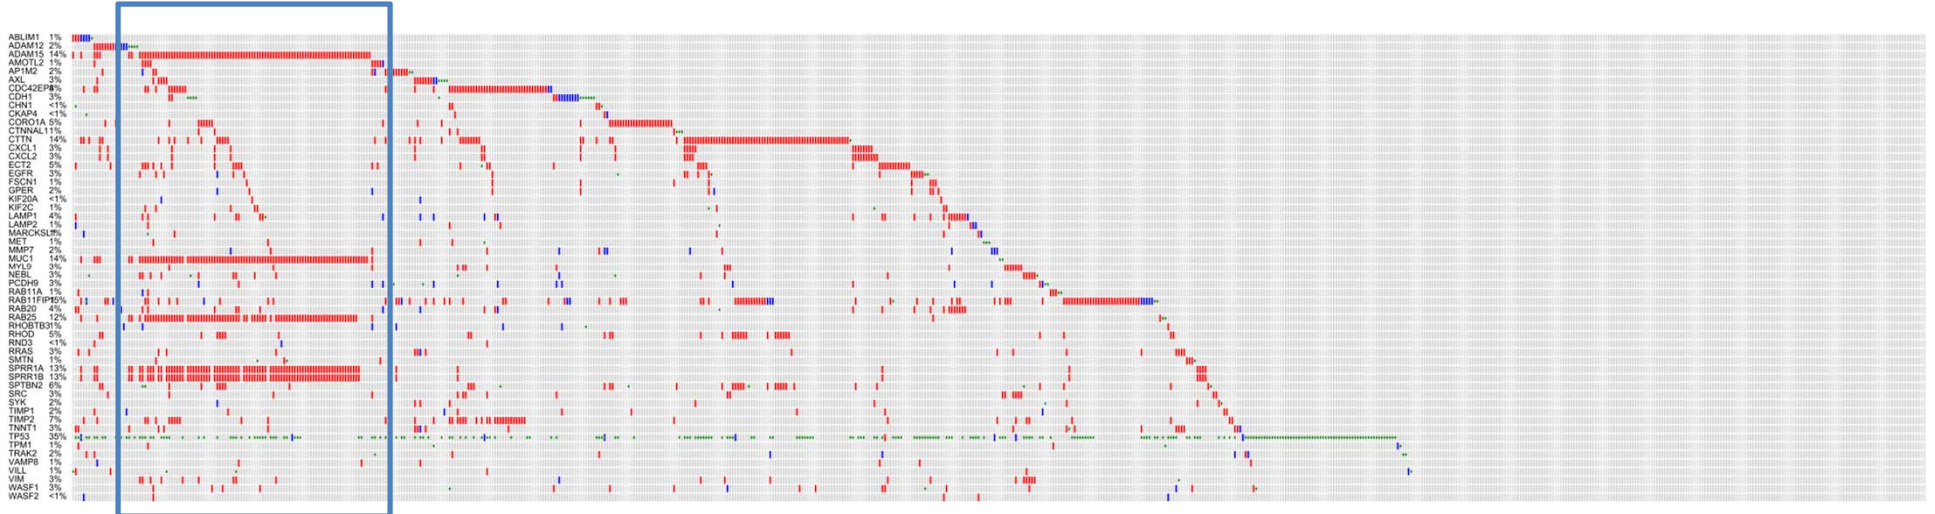

B

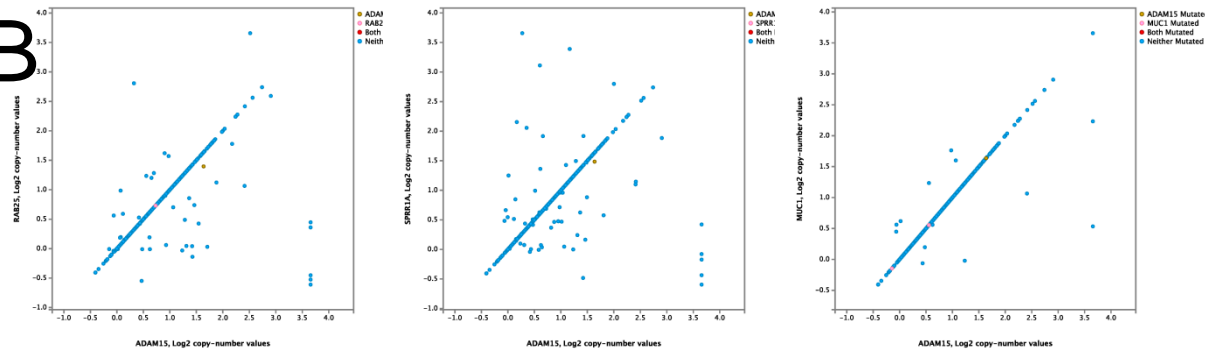

C

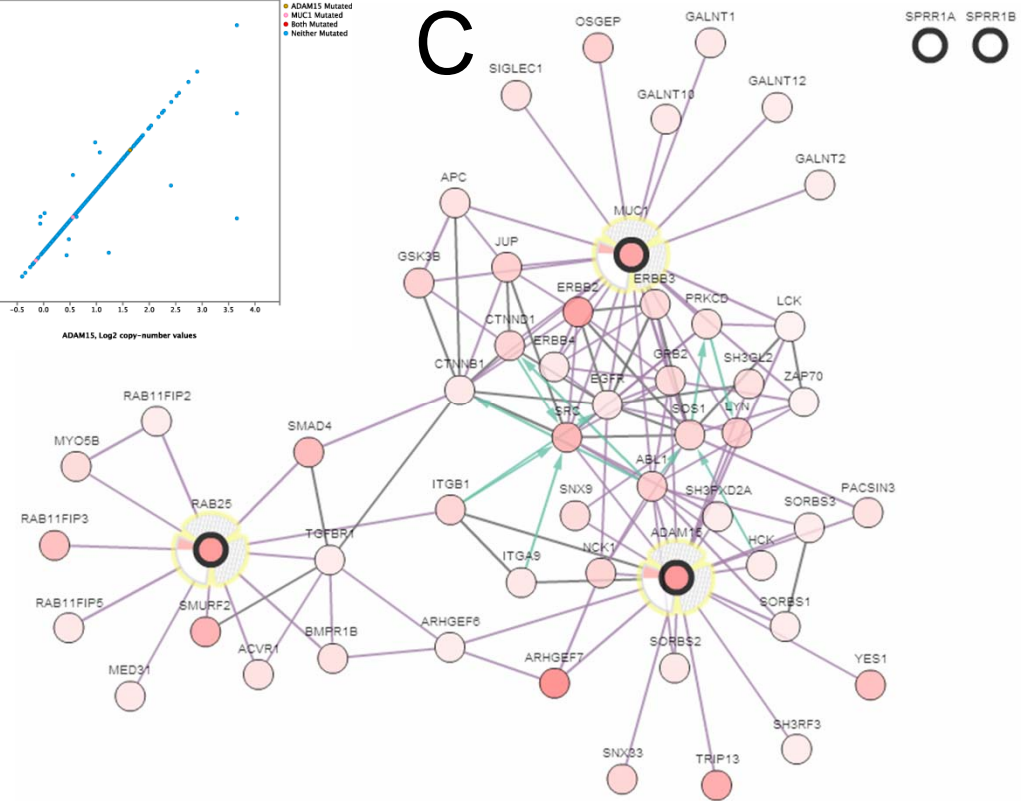

Gene Set / Pathway is altered in 15.7% of all cases.

Breast Invasive Carcinoma (TCGA, Provisional)/User-defined Case List: (696)/User-defined List/5 genes
