# Supplementary material for: SYK Allelic Loss and the Role of Syk-Regulated Genes in Breast Cancer Survival
Source: PubMed Central journal article supplement (PMC3921124; doi:10.1371/journal.pone.0087610), 2014-02-11
Supplement: pone.0087610.s004.pdf [file pone.0087610.s004.pdf]

Figure S 4

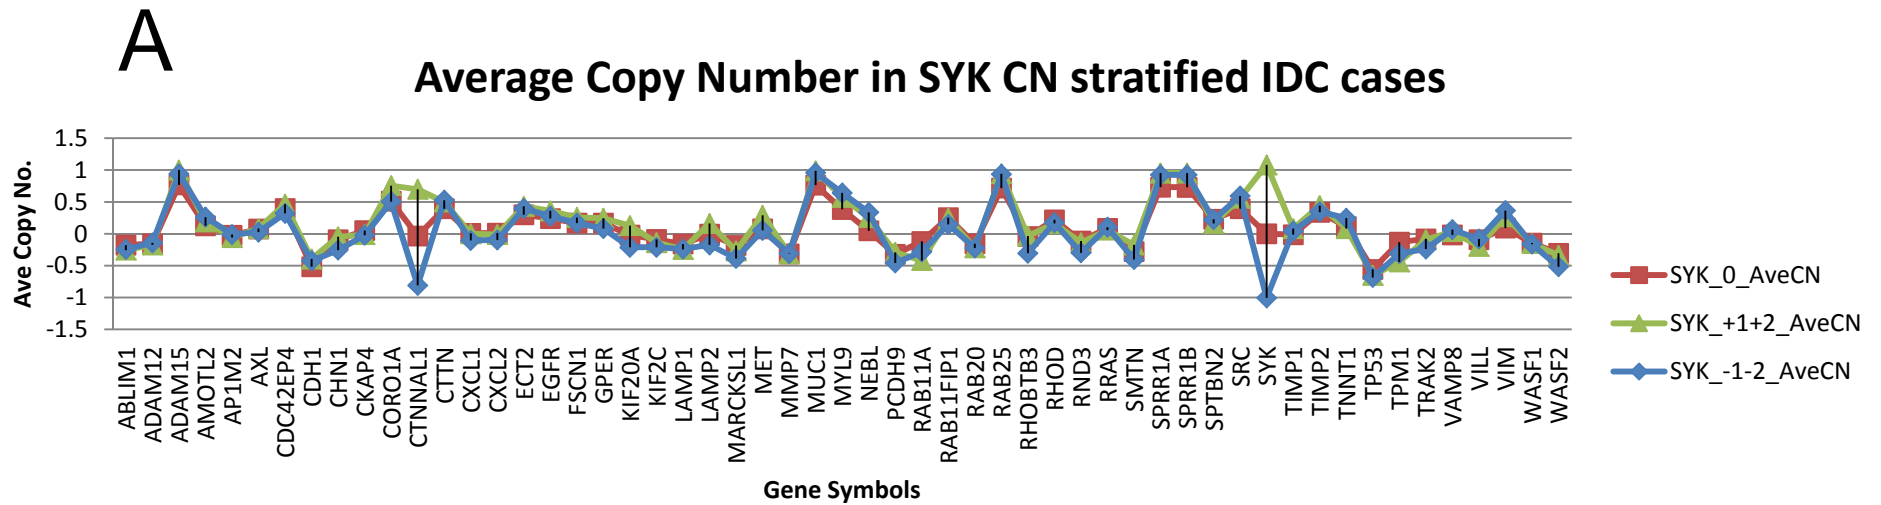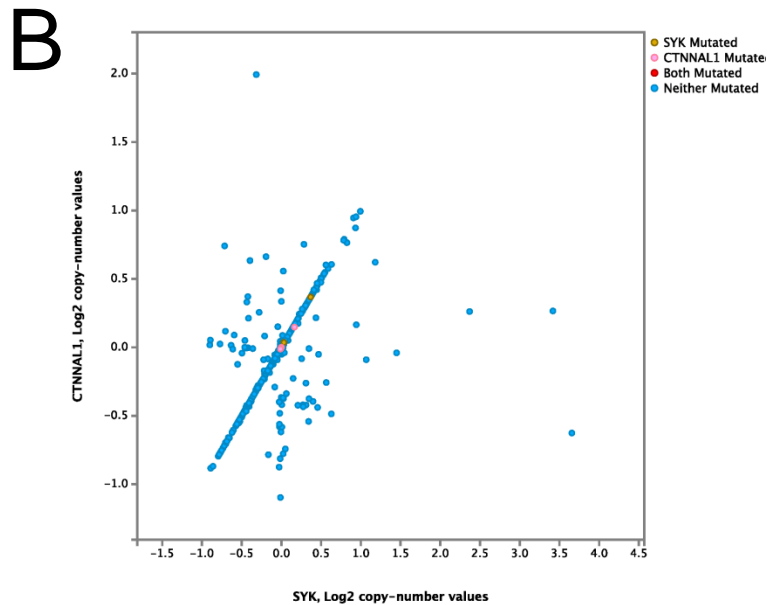

**SYK:** Location: 9q22 Annotation: Chromosome 9, NC\_000009.11 (93564012..93660842)

**CTNNA1** (catenin (cadherin-associated protein), alpha-like 1, alpha-catulin): Location: 9q31.2 Annotation: Chromosome 9, NC\_000009.11 (111704851..111775764, complement)
