# Supplementary material for: SYK Allelic Loss and the Role of Syk-Regulated Genes in Breast Cancer Survival
Source: PubMed Central journal article supplement (PMC3921124; doi:10.1371/journal.pone.0087610), 2014-02-11
Supplement: pone.0087610.s006.pdf [file pone.0087610.s006.pdf]

Table S 1

## Microarray study following SYK knockdown in MCF10A

## TCGA study of CN/mut altered patient cases

| FINAL 55gene ID | FINAL 55gene GENE SYMBOL | Probe set   | Description                                  | mean of                              | mean of                             | FoldDiff (mRNA) <sup>1</sup> | Num Cases Altered | % Cases Altered | GENE_ID | COMMON    | Ave CN gain/loss |
|-----------------|--------------------------|-------------|----------------------------------------------|--------------------------------------|-------------------------------------|------------------------------|-------------------|-----------------|---------|-----------|------------------|
|                 |                          |             |                                              | log intensities for collagen control | log intensities for collagen SYK KD |                              |                   |                 |         |           |                  |
| 40              | SPRR1A                   | 213796_at   | small proline-rich protein 1A                | 5.3513                               | 1.23999                             | <b>17.28</b>                 | 89                | <b>12.80%</b>   | 6698    | SPRR1A    | <b>0.82</b>      |
| 40              | SPRR1A                   | 214549_x_at | small proline-rich protein 1A                | 6.63511                              | 3.57669                             | <b>8.33</b>                  | 89                | <b>12.80%</b>   | 6698    | SPRR1A    | <b>0.82</b>      |
| 4               | AMOTL2                   | 203002_at   | angiomin like 2                              | 4.05109                              | 2.55416                             | <b>2.82</b>                  | 10                | <b>1.40%</b>    | 51421   | AMOTL2    | <b>0.17</b>      |
| 29              | NEBL                     | 203961_at   | nebullette                                   | 4.04029                              | 2.61005                             | <b>2.69</b>                  | 23                | <b>3.30%</b>    | 10529   | NEBL      | <b>0.18</b>      |
| 29              | NEBL                     | 203962_s_at | nebullette                                   | 4.44726                              | 3.03057                             | <b>2.67</b>                  | 23                | <b>3.30%</b>    | 10529   | NEBL      | <b>0.18</b>      |
| 35              | RHOBTB3                  | 202975_s_at | Rho-related BTB domain containing 3          | 3.29064                              | 2.05175                             | <b>2.36</b>                  | 8                 | <b>1.10%</b>    | 22836   | RHOBTB3   | <b>-0.14</b>     |
| 32              | RAB11FIP1                | 219681_s_at | RAB11 family interacting protein 1 (class I) | 3.33121                              | 2.11184                             | <b>2.33</b>                  | 104               | <b>14.90%</b>   | 80223   | RAB11FIP1 | <b>0.20</b>      |
| 49              | TPM1                     | 206116_s_at | tropomyosin 1 (alpha)                        | 4.9529                               | 3.80533                             | <b>2.22</b>                  | 7                 | <b>1.00%</b>    | 7168    | TPM1      | <b>-0.22</b>     |
| 35              | RHOBTB3                  | 202976_s_at | Rho-related BTB domain containing 3          | 2.96163                              | 1.85266                             | <b>2.16</b>                  | 8                 | <b>1.10%</b>    | 22836   | RHOBTB3   | <b>-0.14</b>     |
| 28              | MYL9                     | 201058_s_at | myosin, light chain 9, regulatory            | 2.44787                              | 1.35916                             | <b>2.13</b>                  | 19                | <b>2.70%</b>    | 10398   | MYL9      | <b>0.47</b>      |
| 49              | TPM1                     | 210987_x_at | tropomyosin 1 (alpha)                        | 5.3621                               | 4.30889                             | <b>2.08</b>                  | 7                 | <b>1.00%</b>    | 7168    | TPM1      | <b>-0.22</b>     |
| 49              | TPM1                     | 206117_at   | tropomyosin 1 (alpha)                        | 2.714                                | 1.67104                             | <b>2.06</b>                  | 7                 | <b>1.00%</b>    | 7168    | TPM1      | <b>-0.22</b>     |
| 34              | RAB25                    | 218186_at   | RAB25, member RAS oncogene family            | 6.18144                              | 5.18108                             | <b>2.00</b>                  | 85                | <b>12.20%</b>   | 57111   | RAB25     | <b>0.81</b>      |
| 49              | TPM1                     | 210986_s_at | tropomyosin 1 (alpha)                        | 6.04476                              | 5.07147                             | <b>1.96</b>                  | 7                 | <b>1.00%</b>    | 7168    | TPM1      | <b>-0.22</b>     |

Table S 1

|    |        |             |                                                  |         |         |             |    |               |       |        |              |
|----|--------|-------------|--------------------------------------------------|---------|---------|-------------|----|---------------|-------|--------|--------------|
| 37 | RND3   | 212724_at   | Rho family GTPase 3                              | 3.9234  | 2.97365 | <b>1.93</b> | 3  | <b>0.40%</b>  | 390   | RND3   | <b>-0.17</b> |
| 26 | MMP7   | 204259_at   | matrix metalloproteinase 7 (matrilysin, uterine) | 1.85931 | 0.92773 | <b>1.91</b> | 14 | <b>2.00%</b>  | 4316  | MMP7   | <b>-0.31</b> |
| 27 | MUC1   | 207847_s_at | mucin 1, cell surface associated                 | 4.6449  | 3.73202 | <b>1.88</b> | 94 | <b>13.50%</b> | 4582  | MUC1   | <b>0.84</b>  |
| 11 | CORO1A | 209083_at   | coronin, actin binding protein, 1A               | 2.77829 | 1.86761 | <b>1.88</b> | 37 | <b>5.30%</b>  | 11151 | CORO1A | <b>0.52</b>  |
| 46 | TIMP2  | 203167_at   | TIMP metalloproteinase inhibitor 2               | 3.60008 | 2.69077 | <b>1.88</b> | 47 | <b>6.80%</b>  | 7077  | TIMP2  | <b>0.34</b>  |
| 27 | MUC1   | 213693_s_at | mucin 1, cell surface associated                 | 5.90508 | 5.00689 | <b>1.86</b> | 94 | <b>13.50%</b> | 4582  | MUC1   | <b>0.84</b>  |
| 36 | RHOD   | 209885_at   | ras homolog gene family, member D                | 5.77086 | 4.89576 | <b>1.83</b> | 33 | <b>4.70%</b>  | 29984 | RHOD   | <b>0.18</b>  |
| 52 | VILL   | 209950_s_at | villin-like                                      | 1.85609 | 1.00962 | <b>1.80</b> | 9  | <b>1.30%</b>  | 50853 | VILL   | <b>-0.12</b> |
| 5  | AP1M2  | 65517_at    | adaptor-related protein complex 1, mu 2 subunit  | 3.91307 | 3.08498 | <b>1.78</b> | 17 | <b>2.40%</b>  | 10053 | AP1M2  | <b>-0.03</b> |
| 5  | AP1M2  | 218261_at   | adaptor-related protein complex 1, mu 2 subunit  | 4.74543 | 3.91829 | <b>1.77</b> | 17 | <b>2.40%</b>  | 10053 | AP1M2  | <b>-0.03</b> |
| 29 | NEBL   | 207279_s_at | nebulette                                        | 2.16513 | 1.35608 | <b>1.75</b> | 23 | <b>3.30%</b>  | 10529 | NEBL   | <b>0.18</b>  |
| 9  | CHN1   | 212624_s_at | chimerin (chimaerin) 1                           | 4.32125 | 3.58034 | <b>1.67</b> | 6  | <b>0.90%</b>  | 1123  | CHN1   | <b>-0.13</b> |
| 44 | SYK    | 207540_s_at | spleen tyrosine kinase                           | 2.09222 | 1.35864 | <b>1.66</b> | 11 | <b>1.60%</b>  | 6850  | SYK    | <b>-0.14</b> |
| 36 | RHOD   | 31846_at    | ras homolog gene family, member D                | 6.65006 | 5.92047 | <b>1.66</b> | 33 | <b>4.70%</b>  | 29984 | RHOD   | <b>0.18</b>  |
| 50 | TRAK2  | 202124_s_at | trafficking protein, kinesin binding 2           | 2.90888 | 2.20315 | <b>1.63</b> | 12 | <b>1.70%</b>  | 66008 | TRAK2  | <b>-0.12</b> |
| 42 | SPTBN2 | 205155_s_at | spectrin, beta, non-erythrocytic 2               | 2.7319  | 2.06609 | <b>1.59</b> | 42 | <b>6.00%</b>  | 6712  | SPTBN2 | <b>0.20</b>  |

Table S 1

|    |          |             |                        |         |         |             |    |              |       |          |              |  |
|----|----------|-------------|------------------------|---------|---------|-------------|----|--------------|-------|----------|--------------|--|
|    |          |             | Rho-related BTB        |         |         |             |    |              |       |          |              |  |
| 35 | RHOBTB3  | 216048_s_at | domain containing 3    | 1.73529 | 1.08295 | <b>1.57</b> | 8  | <b>1.10%</b> | 22836 | RHOBTB3  | <b>-0.14</b> |  |
| 30 | PCDH9    | 219737_s_at | protocadherin 9        | 2.30688 | 1.67923 | <b>1.55</b> | 18 | <b>2.60%</b> | 5101  | PCDH9    | <b>-0.36</b> |  |
|    |          |             | RAB11A, member RAS     |         |         |             |    |              |       |          |              |  |
| 31 | RAB11A   | 200864_s_at | oncogene family        | 3.92712 | 3.3079  | <b>1.54</b> | 8  | <b>1.10%</b> | 8766  | RAB11A   | <b>-0.21</b> |  |
|    |          |             | actin binding LIM      |         |         |             |    |              |       |          |              |  |
| 1  | ABLIM1   | 200965_s_at | protein 1              | 4.80373 | 4.19058 | <b>1.53</b> | 8  | <b>1.10%</b> | 3983  | ABLIM1   | <b>-0.20</b> |  |
|    |          |             | CDC42 effector         |         |         |             |    |              |       |          |              |  |
| 7  | CDC42EP4 | 214721_x_at | protein (Rho GTPase    | 2.86751 | 2.26813 | <b>1.52</b> | 56 | <b>8.00%</b> | 23580 | CDC42EP4 | <b>0.37</b>  |  |
|    |          |             | binding) 4             |         |         |             |    |              |       |          |              |  |
| 50 | TRAK2    | 202125_s_at | trafficking protein,   | 2.74738 | 2.15236 | <b>1.51</b> | 12 | <b>1.70%</b> | 66008 | TRAK2    | <b>-0.12</b> |  |
|    |          |             | kinesin binding 2      |         |         |             |    |              |       |          |              |  |
|    |          |             | vesicle-associated     |         |         |             |    |              |       |          |              |  |
| 51 | VAMP8    | 202546_at   | membrane protein 8     | 6.43236 | 5.84249 | <b>1.51</b> | 7  | <b>1.00%</b> | 8673  | VAMP8    | <b>0.03</b>  |  |
|    |          |             | (endobrevin)           |         |         |             |    |              |       |          |              |  |
| 19 | GPER     | 210640_s_at | G protein-coupled      | 1.66389 | 2.24987 | <b>0.67</b> | 11 | <b>1.60%</b> | 2852  | GPER     | <b>0.15</b>  |  |
|    |          |             | estrogen receptor 1    |         |         |             |    |              |       |          |              |  |
|    |          |             | ADAM                   |         |         |             |    |              |       |          |              |  |
|    |          |             | metallopeptidase       |         |         |             |    |              |       |          |              |  |
| 2  | ADAM12   | 213790_at   | domain 12 (meltrin     | 1.01558 | 1.61077 | <b>0.66</b> | 17 | <b>2.40%</b> | 8038  | ADAM12   | <b>-0.16</b> |  |
|    |          |             | alpha)                 |         |         |             |    |              |       |          |              |  |
|    |          |             | kinesin family         |         |         |             |    |              |       |          |              |  |
| 20 | KIF20A   | 218755_at   | member 20A             | 3.93348 | 4.52913 | <b>0.66</b> | 4  | <b>0.60%</b> | 10112 | KIF20A   | <b>-0.07</b> |  |
|    | MARCKSL  |             |                        |         |         |             |    |              |       |          |              |  |
| 24 | 1        | 200644_at   | MARCKS-like 1          | 2.2633  | 2.87432 | <b>0.65</b> | 7  | <b>1.00%</b> | 65108 | MARCKSL1 | <b>-0.24</b> |  |
|    |          |             | WAS protein family,    |         |         |             |    |              |       |          |              |  |
| 54 | WASF1    | 204165_at   | member 1               | 2.45494 | 3.06884 | <b>0.65</b> | 20 | <b>2.90%</b> | 8936  | WASF1    | <b>-0.14</b> |  |
|    |          |             | epidermal growth       |         |         |             |    |              |       |          |              |  |
|    |          |             | factor receptor        |         |         |             |    |              |       |          |              |  |
|    |          |             | (erythroblastic        |         |         |             |    |              |       |          |              |  |
|    |          |             | leukemia viral (v-erb- |         |         |             |    |              |       |          |              |  |
|    |          |             | b) oncogene homolog,   |         |         |             |    |              |       |          |              |  |
| 17 | EGFR     | 211607_x_at | avian)                 | 2.16901 | 2.80621 | <b>0.64</b> | 21 | <b>3.00%</b> | 1956  | EGFR     | <b>0.27</b>  |  |

Table S 1

|    |         |             |                                                                                                    |         |         |             |    |              |       |         |              |
|----|---------|-------------|----------------------------------------------------------------------------------------------------|---------|---------|-------------|----|--------------|-------|---------|--------------|
| 16 | ECT2    | 219787_s_at | epithelial cell transforming sequence 2 oncogene                                                   | 3.15335 | 3.79151 | <b>0.64</b> | 37 | <b>5.30%</b> | 1894  | ECT2    | <b>0.35</b>  |
| 21 | KIF2C   | 211519_s_at | kinesin family member 2C                                                                           | 3.04305 | 3.68307 | <b>0.64</b> | 10 | <b>1.40%</b> | 11004 | KIF2C   | <b>-0.11</b> |
| 17 | EGFR    | 210984_x_at | epidermal growth factor receptor (erythroblastic leukemia viral (v-erb-b) oncogene homolog, avian) | 2.33473 | 2.9983  | <b>0.63</b> | 21 | <b>3.00%</b> | 1956  | EGFR    | <b>0.27</b>  |
| 17 | EGFR    | 201984_s_at | epidermal growth factor receptor (erythroblastic leukemia viral (v-erb-b) oncogene homolog, avian) | 2.98141 | 3.65271 | <b>0.63</b> | 21 | <b>3.00%</b> | 1956  | EGFR    | <b>0.27</b>  |
| 21 | KIF2C   | 209408_at   | kinesin family member 2C                                                                           | 3.98417 | 4.68218 | <b>0.62</b> | 10 | <b>1.40%</b> | 11004 | KIF2C   | <b>-0.11</b> |
| 10 | CKAP4   | 200999_s_at | cytoskeleton-associated protein 4                                                                  | 3.94643 | 4.67124 | <b>0.61</b> | 4  | <b>0.60%</b> | 10970 | CKAP4   | <b>0.01</b>  |
| 25 | MET     | 203510_at   | met proto-oncogene (hepatocyte growth factor receptor)                                             | 4.11472 | 4.84654 | <b>0.60</b> | 9  | <b>1.30%</b> | 4233  | MET     | <b>0.10</b>  |
| 12 | CTNNAL1 | 202468_s_at | catenin (cadherin-associated protein), alpha-like 1                                                | 4.07129 | 4.81079 | <b>0.60</b> | 8  | <b>1.10%</b> | 8727  | CTNNAL1 | <b>-0.16</b> |
| 22 | LAMP1   | 201551_s_at | lysosomal-associated membrane protein 1                                                            | 3.33078 | 4.0833  | <b>0.59</b> | 29 | <b>4.20%</b> | 3916  | LAMP1   | <b>-0.19</b> |
| 39 | SMTN    | 209427_at   | smoothelin                                                                                         | 3.55693 | 4.31091 | <b>0.59</b> | 9  | <b>1.30%</b> | 6525  | SMTN    | <b>-0.31</b> |

Table S 1

|    |        |             |                                                                                                                    |         |         |             |    |               |       |        |              |
|----|--------|-------------|--------------------------------------------------------------------------------------------------------------------|---------|---------|-------------|----|---------------|-------|--------|--------------|
| 33 | RAB20  | 219622_at   | RAB20, member RAS<br>oncogene family<br>related RAS viral (r-<br>ras) oncogene                                     | 2.85501 | 3.63536 | <b>0.58</b> | 28 | <b>4.00%</b>  | 55647 | RAB20  | <b>-0.19</b> |
| 38 | RRAS   | 212647_at   | homolog<br>chemokine (C-X-C<br>motif) ligand 2                                                                     | 3.32575 | 4.13953 | <b>0.57</b> | 18 | <b>2.60%</b>  | 6237  | RRAS   | <b>0.09</b>  |
| 15 | CXCL2  | 209774_x_at | ADAM<br>metallopeptidase<br>domain 15                                                                              | 1.38434 | 2.20515 | <b>0.57</b> | 24 | <b>3.40%</b>  | 2920  | CXCL2  | <b>-0.02</b> |
| 3  | ADAM15 | 217007_s_at | smoothelin                                                                                                         | 3.50458 | 4.32974 | <b>0.56</b> | 94 | <b>13.50%</b> | 8751  | ADAM15 | <b>0.84</b>  |
| 39 | SMTN   | 207390_s_at |                                                                                                                    | 3.02705 | 3.86486 | <b>0.56</b> | 9  | <b>1.30%</b>  | 6525  | SMTN   | <b>-0.31</b> |
| 23 | LAMP2  | 200821_at   | lysosomal-associated<br>membrane protein 2<br>ADAM<br>metallopeptidase<br>domain 12 (meltrin<br>alpha)             | 2.99777 | 3.83674 | <b>0.56</b> | 9  | <b>1.30%</b>  | 3920  | LAMP2  | <b>-0.03</b> |
| 2  | ADAM12 | 202952_s_at | WAS protein family,<br>member 2                                                                                    | 1.31031 | 2.18956 | <b>0.54</b> | 17 | <b>2.40%</b>  | 8038  | ADAM12 | <b>-0.16</b> |
| 55 | WASF2  | 221725_at   | epidermal growth<br>factor receptor<br>(erythroblastic<br>leukemia viral (v-erb-<br>b) oncogene homolog,<br>avian) | 3.80122 | 4.70557 | <b>0.53</b> | 5  | <b>0.70%</b>  | 10163 | WASF2  | <b>-0.36</b> |
| 17 | EGFR   | 201983_s_at | TIMP<br>metallopeptidase<br>inhibitor 1                                                                            | 4.65262 | 5.56341 | <b>0.53</b> | 21 | <b>3.00%</b>  | 1956  | EGFR   | <b>0.27</b>  |
| 45 | TIMP1  | 201666_at   | chemokine (C-X-C<br>motif) ligand 1<br>(melanoma growth<br>stimulating activity,<br>alpha)                         | 6.4029  | 7.3157  | <b>0.53</b> | 12 | <b>1.70%</b>  | 7076  | TIMP1  | <b>0.02</b>  |
| 14 | CXCL1  | 204470_at   |                                                                                                                    | 1.24742 | 2.16559 | <b>0.53</b> | 23 | <b>3.30%</b>  | 2919  | CXCL1  | <b>-0.02</b> |

Table S 1

|    |       |             |                                                                          |         |         |             |    |              |      |       |             |
|----|-------|-------------|--------------------------------------------------------------------------|---------|---------|-------------|----|--------------|------|-------|-------------|
| 6  | AXL   | 202686_s_at | AXL receptor tyrosine kinase                                             | 3.52507 | 4.47528 | <b>0.52</b> | 19 | <b>2.70%</b> | 558  | AXL   | <b>0.04</b> |
| 18 | FSCN1 | 201564_s_at | fascin homolog 1, actin-bundling protein (Strongylocentrotus purpuratus) | 4.15038 | 5.26761 | <b>0.46</b> | 9  | <b>1.30%</b> | 6624 | FSCN1 | <b>0.18</b> |
| 47 | TNNT1 | 213201_s_at | troponin T type 1 (skeletal, slow)                                       | 2.15726 | 3.39845 | <b>0.42</b> | 23 | <b>3.30%</b> | 7138 | TNNT1 | <b>0.14</b> |
| 18 | FSCN1 | 210933_s_at | fascin homolog 1, actin-bundling protein (Strongylocentrotus purpuratus) | 3.91259 | 5.16952 | <b>0.42</b> | 9  | <b>1.30%</b> | 6624 | FSCN1 | <b>0.18</b> |
| 53 | VIM   | 201426_s_at | vimentin                                                                 | 3.68115 | 5.4293  | <b>0.30</b> | 22 | <b>3.20%</b> | 7431 | VIM   | <b>0.21</b> |

<sup>1</sup> **>=1.5 down-regulated genes; <= 0.67 up-regulated genes**
