# Supplementary material for: SYK Allelic Loss and the Role of Syk-Regulated Genes in Breast Cancer Survival
Source: PubMed Central journal article supplement (PMC3921124; doi:10.1371/journal.pone.0087610), 2014-02-11
Supplement: pone.0087610.s007.pdf [file pone.0087610.s007.pdf]

Table S 2.

Summary of FISH, *in situ*, and methylation data for SYK in tumor epithelium.

| Slide name                  | % DCIS | DCIS Allelic Loss <sup>1</sup> | SYK <i>In situ</i> <sup>2</sup> |      |     | SYK Methylation <sup>3</sup> |                         |             | Syk Protein <sup>4</sup> |                           |              |
|-----------------------------|--------|--------------------------------|---------------------------------|------|-----|------------------------------|-------------------------|-------------|--------------------------|---------------------------|--------------|
|                             |        |                                | Benign                          | DCIS | IDC | Benign                       | DCIS                    | IDC         | Benign                   | DCIS                      | IDC          |
| <b><u>DCIS ONLY</u></b>     |        |                                |                                 |      |     |                              |                         |             |                          |                           |              |
| 38<br><b>8081</b>           | 100    | 1.1                            |                                 | 2.0  |     |                              | 4.0                     |             |                          | 137.2                     |              |
| 38<br><b>07405</b>          | 100    | 1.1                            | 2.0                             | 2.0  |     |                              | 7.3                     |             | 194.0                    | <b>273.1</b> <sup>5</sup> |              |
| 38<br><b>2194</b>           | 100    | 0.9                            | 3.0                             | 2.0  |     |                              | N.D.                    |             | 195.4                    | 196.9                     |              |
| 38<br><b>06830</b>          | 100    | 0.8                            | 3.0                             | 3.0  |     |                              | N.D.                    |             | 93.4                     | <b>123.7</b>              |              |
| 38<br>06768                 | 100    | 0.7                            | 3.0                             |      |     | 5.8                          | <b>9.3</b> <sup>6</sup> |             | 206.9                    |                           |              |
| 38<br><b>10095</b>          | 100    | 1.0                            | 3.0                             | 2.0  |     |                              | <b>10.3</b>             |             | 173.3                    | 208.8                     |              |
| 38<br>1855                  | 100    | 0.9                            | 3.0                             | 2.0  |     |                              | <b>9.8</b>              |             | 145.1                    | <b>80.3</b>               |              |
| 38<br><b>4205</b>           | 100    | 0.9                            |                                 | 0.0  |     |                              | <b>9.1</b>              |             | 202.5                    | 192.3                     |              |
| <b><u>DCIS with IDC</u></b> |        |                                |                                 |      |     |                              |                         |             |                          |                           |              |
| 39<br>7038                  | 60     | 0.9                            | 3.0                             |      | 0.0 |                              | N.D.                    |             | N.D.                     |                           |              |
| 36<br>2059                  |        | 0.9                            | 3.0                             | 2.0  | 2.5 |                              | N.D.                    | 3.9         | N.D.                     |                           |              |
| 38<br><b>02422</b>          | 70     | 0.9                            |                                 | 0.0  | 0.0 |                              | <b>9.7</b>              | 3.4         | 281.0                    | <b>224.1</b>              | <b>174.7</b> |
| 36<br>10462                 |        | 0.9                            | 1.0                             | 3.0  | 2.0 |                              | <b>10.7</b>             | 5.0         | N.D.                     |                           |              |
| 39<br><b>04168</b>          | 70     | 0.8                            |                                 | 2.0  |     |                              | 4.3                     |             | N.D.                     | 246.0                     |              |
| 38<br>10443                 | 50     | 0.8                            | 3.0                             | 0.0  |     |                              | <b>11.2</b>             |             | N.D.                     |                           |              |
| 39<br><b>06013</b>          | 98     | <b>0.5</b> <sup>7</sup>        | 3.0                             | 3.0  |     |                              | 7.0                     |             | 421.5                    | <b>214.5</b>              |              |
| 38<br><b>11203</b>          | 70     | <b>0.6</b>                     | 3.0                             | 2.0  | 0.0 |                              | 2.2                     |             |                          | 308.3                     | 350.0        |
| 39<br><b>08204</b>          | 70     | <b>0.3</b>                     | 3.0                             | 2.0  |     |                              | 5.3                     | <b>13.5</b> | 279.6                    | 253.8                     | <b>174.8</b> |
| 39<br><b>07489</b>          | 50     | <b>0.6</b>                     |                                 | 2.0  | 0.0 |                              | 4.5                     | <b>11.1</b> |                          | 121.3                     | <b>150.6</b> |
| 36<br><b>6362</b>           |        | <b>0.5</b>                     | 3.0                             | 2.5  | 2.5 |                              |                         | 7.7         |                          | 216.5                     | <b>168.8</b> |

| <b>Benign ONLY</b> |        |     |     |     |  |       |
|--------------------|--------|-----|-----|-----|--|-------|
| 35 870             | benign | 0.8 | 3.5 | 6.0 |  | 47.6  |
| 35                 |        |     |     |     |  |       |
| 4850               | benign | 0.8 | 3.5 | 1.7 |  | 118.8 |
| 36                 |        |     |     |     |  |       |
| 11964              | benign | 0.7 | 3.0 | 7.3 |  |       |
| 36                 |        |     |     |     |  |       |
| 10605              | benign | 0.8 | 3.0 |     |  |       |
| 36                 |        |     |     |     |  |       |
| 3757               | benign | 0.7 |     |     |  |       |

<sup>1</sup> Ratio of Syk/ Chromosome 9 Centromere marker, Average of 30 cells, cut off of 0.6

<sup>2</sup> from Moroni et al., (2004) Progressive loss of Syk and abnormal proliferation in breast cancer cells. Cancer Res 64: 7346-7354.

<sup>3</sup> Pyrosequencing, result is average of 4 CpG's, cut off above normal breast control + 1 S.D.

<sup>4</sup> Immunofluorescence staining for epithelial Syk, average intensity (bold is P < 0.05 for adjacent value).

<sup>5</sup> Bold indicates protein staining intensity significantly different from tissue to left, P < 0.05.

<sup>6</sup> Bold indicates methylation value in the positive range (see *Methods*).

<sup>7</sup> Bold indicates allelic loss (see *Methods*).
