# Supplementary material for: SYK Allelic Loss and the Role of Syk-Regulated Genes in Breast Cancer Survival
Source: PubMed Central journal article supplement (PMC3921124; doi:10.1371/journal.pone.0087610), 2014-02-11
Supplement: pone.0087610.s008.pdf [file pone.0087610.s008.pdf]

Table S 3

| Category      | Term                                                               | Count | %        | PValue   | Genes                                                                                             | List Total | Pop Hits | Pop Total | Fold Enrichment | Bonferroni  | Benjamini   | FDR      |
|---------------|--------------------------------------------------------------------|-------|----------|----------|---------------------------------------------------------------------------------------------------|------------|----------|-----------|-----------------|-------------|-------------|----------|
| GOTERM_BP_FAT | prenylation                                                        | 6     | 1.010101 | 7.55E-05 | RND3, RRAS, RAB11A, RAB25, RHOD, RAB20                                                            | 55         | 156      | 19235     | 13.45104895     | 0.010593133 | 0.001773366 | 0.089189 |
| GOTERM_BP_FAT | short sequence motif:Effector region                               | 6     | 1.010101 | 7.12E-06 | RND3, RRAS, RAB11A, RAB25, RHOD, RAB20                                                            | 55         | 95       | 19113     | 21.94794258     | 0.002338387 | 0.002338387 | 0.009642 |
| GOTERM_BP_FAT | IPR001806:Ras GTPase                                               | 6     | 1.010101 | 6.81E-05 | RND3, RRAS, RAB11A, RAB25, RHOD, RAB20                                                            | 54         | 135      | 16659     | 13.71111111     | 0.00956178  | 0.004792373 | 0.080467 |
| GOTERM_BP_FAT | GO:0030674~protein binding, bridging                               | 5     | 0.841751 | 3.06E-04 | SPRR1A, SPRR1B, FSCN1, CHN1, SRC                                                                  | 46         | 94       | 12983     | 15.0127197      | 0.034573947 | 0.008757867 | 0.34791  |
| GOTERM_BP_FAT | nucleotide-binding                                                 | 14    | 2.356902 | 6.26E-04 | EGFR, MET, AXL, SRC, RND3, KIF2C, RAB11A, RRAS, RAB25, RHOD, RAB20, SYK, KIF20A, RHOBTB3          | 55         | 1686     | 19235     | 2.904022431     | 0.084471623 | 0.009758069 | 0.736711 |
| GOTERM_BP_FAT | IPR001245:Tyrosine protein kinase                                  | 5     | 0.841751 | 5.36E-04 | EGFR, MET, AXL, SRC, SYK                                                                          | 54         | 118      | 16659     | 13.0720339      | 0.072793149 | 0.015002051 | 0.631237 |
| GOTERM_BP_FAT | transmembrane protein                                              | 8     | 1.346801 | 0.002025 | EGFR, MUC1, LAMP1, LAMP2, GPER, MET, AXL, CDH1                                                    | 55         | 642      | 19235     | 4.357972246     | 0.248649508 | 0.028183524 | 2.366822 |
| GOTERM_BP_FAT | lipid moiety-binding region:S-geranylgeranyl cysteine              | 5     | 0.841751 | 1.97E-04 | RRAS, RAB11A, RAB25, RHOD, RAB20                                                                  | 55         | 102      | 19113     | 17.03475936     | 0.06275721  | 0.031886995 | 0.266597 |
| GOTERM_BP_FAT | GO:0005200~structural constituent of cytoskeleton                  | 4     | 0.673401 | 0.002124 | VIM, SPTBN2, TPM1, VILL                                                                           | 46         | 74       | 12983     | 15.25616921     | 0.216937466 | 0.034331503 | 2.393109 |
| GOTERM_BP_FAT | GO:0032555~purine ribonucleotide binding                           | 15    | 2.525253 | 0.002759 | EGFR, MET, TP53, AXL, SRC, RND3, KIF2C, RAB11A, RRAS, RAB25, RHOD, RAB20, SYK, KIF20A, RHOBTB3    | 46         | 1836     | 12983     | 2.305875249     | 0.272176835 | 0.034683918 | 3.097811 |
| GOTERM_BP_FAT | GO:0032553~ribonucleotide binding                                  | 15    | 2.525253 | 0.002759 | EGFR, MET, TP53, AXL, SRC, RND3, KIF2C, RAB11A, RRAS, RAB25, RHOD, RAB20, SYK, KIF20A, RHOBTB3    | 46         | 1836     | 12983     | 2.305875249     | 0.272176835 | 0.034683918 | 3.097811 |
| GOTERM_BP_FAT | GO:0004713~protein tyrosine kinase activity                        | 5     | 0.841751 | 0.002553 | EGFR, MET, AXL, SRC, SYK                                                                          | 46         | 166      | 12983     | 8.501178628     | 0.254741681 | 0.036085854 | 2.870328 |
| GOTERM_BP_FAT | transforming protein                                               | 3     | 0.505051 | 0.004097 | AXL, RRAS, SRC                                                                                    | 55         | 34       | 19235     | 30.85828877     | 0.439469288 | 0.037856255 | 4.734355 |
| GOTERM_BP_FAT | GO:0030029~actin filament-based process                            | 7     | 1.178451 | 2.48E-04 | CXCL1, RND3, CORO1A, WASF1, WASF2, FSCN1, TPM1                                                    | 51         | 241      | 13528     | 7.704499227     | 0.178971791 | 0.038671947 | 0.379304 |
| GOTERM_BP_FAT | GO:0032970~regulation of actin filament-based process              | 5     | 0.841751 | 3.63E-04 | CORO1A, SPTBN2, TPM1, VILL, NEBL                                                                  | 51         | 92       | 13528     | 14.41602728     | 0.251097881 | 0.040465216 | 0.555673 |
| GOTERM_BP_FAT | GO:0032956~regulation of actin cytoskeleton organization           | 5     | 0.841751 | 3.20E-04 | CORO1A, SPTBN2, TPM1, VILL, NEBL                                                                  | 51         | 89       | 13528     | 14.90196078     | 0.224870036 | 0.041565538 | 0.489684 |
| GOTERM_BP_FAT | hsa05219:Bladder cancer                                            | 3     | 0.505051 | 0.015099 | EGFR, TP53, CDH1                                                                                  | 24         | 42       | 5085      | 15.13392857     | 0.539709022 | 0.10492015  | 13.68583 |
| GOTERM_BP_FAT | hsa05213:Endometrial cancer                                        | 3     | 0.505051 | 0.022626 | EGFR, TP53, CDH1                                                                                  | 24         | 52       | 5085      | 12.22355769     | 0.688755723 | 0.121629118 | 19.86013 |
| GOTERM_BP_FAT | GO:0004714~transmembrane receptor protein tyrosine kinase activity | 3     | 0.505051 | 0.02252  | EGFR, MET, AXL                                                                                    | 46         | 67       | 12983     | 12.637573       | 0.927156449 | 0.160231834 | 22.85297 |
| GOTERM_BP_FAT | GO:0003924~GTPase activity                                         | 4     | 0.673401 | 0.036443 | RND3, RRAS, RAB11A, RHOD                                                                          | 46         | 211      | 12983     | 5.350504842     | 0.98600706  | 0.222078417 | 34.48341 |
| GOTERM_BP_FAT | GO:0031988~membrane-bounded vesicle                                | 7     | 1.178451 | 0.026997 | EGFR, LAMP1, CORO1A, LAMP2, RAB11A, RAB11FIP1, TIMP1                                              | 53         | 568      | 12782     | 2.972163168     | 0.994330407 | 0.227892812 | 28.8127  |
| GOTERM_BP_FAT | GO:0044459~plasma membrane part                                    | 16    | 2.693603 | 0.026041 | EGFR, MUC1, AP1M2, GPER, MET, AXL, CDH1, TPM1, AMOTL2, SRC, LAMP1, CORO1A, RRAS, RAB25, RHOD, SYK | 53         | 2203     | 12782     | 1.751573754     | 0.993173047 | 0.230848408 | 27.93854 |
| GOTERM_BP_FAT | GO:0001726~ruffle                                                  | 3     | 0.505051 | 0.030333 | CTTN, WASF2, TPM1                                                                                 | 53         | 67       | 12782     | 10.79864827     | 0.99703759  | 0.242117022 | 31.7849  |
| GOTERM_BP_FAT | IPR002000:Lysosome-associated membrane glycoprotein (Lamp)/CD68    | 2     | 0.3367   | 0.015808 | LAMP1, LAMP2                                                                                      | 54         | 5        | 16659     | 123.4           | 0.89426057  | 0.24485627  | 17.159   |
| GOTERM_BP_FAT | GO:0005794~Golgi apparatus                                         | 9     | 1.515152 | 0.023583 | RND3, AP1M2, VAMP8, GPER, RAB11A, CDH1, RAB20, KIF20A, RHOBTB3                                    | 53         | 872      | 12782     | 2.489137961     | 0.989007721 | 0.245658531 | 25.64771 |
| GOTERM_BP_FAT | GO:0031267~small GTPase binding                                    | 3     | 0.505051 | 0.047779 | CDC42EP4, ECT2, RHOBTB3                                                                           | 46         | 101      | 12983     | 8.383340508     | 0.996412033 | 0.256454047 | 42.74593 |
| GOTERM_BP_FAT | short sequence motif:Cysteine switch                               | 3     | 0.505051 | 0.006569 | MMP7, ADAM12, ADAM15                                                                              | 55         | 43       | 19113     | 24.2448203      | 0.885641292 | 0.303301503 | 8.544089 |
| GOTERM_BP_FAT | region of interest:2 X 12 AA approximate repeats                   | 2     | 0.3367   | 0.005643 | SPRR1A, SPRR1B                                                                                    | 55         | 2        | 19113     | 347.5090909     | 0.844596254 | 0.310884058 | 7.381503 |
| GOTERM_BP_FAT | region of interest:6 X 8 AA approximate tandem repeats             | 2     | 0.3367   | 0.005643 | SPRR1A, SPRR1B                                                                                    | 55         | 2        | 19113     | 347.5090909     | 0.844596254 | 0.310884058 | 7.381503 |
| GOTERM_BP_FAT | glycosylation site:N-linked (GlcNAc...) (polylactosaminoglycan)    | 2     | 0.3367   | 0.005643 | LAMP1, LAMP2                                                                                      | 55         | 2        | 19113     | 347.5090909     | 0.844596254 | 0.310884058 | 7.381503 |
| GOTERM_BP_FAT | SMO0153:VHP                                                        | 2     | 0.3367   | 0.031297 | ABLIM1, VILL                                                                                      | 37         | 8        | 9079      | 61.34459459     | 0.701290007 | 0.331527954 | 24.97581 |
| GOTERM_BP_FAT | PIRSF002462:lysosome-associated membrane protein                   | 2     | 0.3367   | 0.012121 | LAMP1, LAMP2                                                                                      | 31         | 3        | 7396      | 159.0537634     | 0.370868686 | 0.370868686 | 10.43555 |
| GOTERM_BP_FAT | IPR002473:Small chemokine, C-X-C/Interleukin 8                     | 2     | 0.3367   | 0.043648 | CXCL1, CXCL2                                                                                      | 54         | 14       | 16659     | 44.07142857     | 0.998150204 | 0.408083668 | 40.97649 |

Table S 3

|               |                                                                                                            |    |          |          |                                                                                                                                                                                                                          |    |      |       |             |             |             |          |
|---------------|------------------------------------------------------------------------------------------------------------|----|----------|----------|--------------------------------------------------------------------------------------------------------------------------------------------------------------------------------------------------------------------------|----|------|-------|-------------|-------------|-------------|----------|
| GOTERM_BP_FAT | IPR001089:Small chemokine, C-X-C                                                                           | 2  | 0.3367   | 0.040593 | CXCL1, CXCL2                                                                                                                                                                                                             | 54 | 13   | 16659 | 47.46153846 | 0.997099949 | 0.412091683 | 38.7104  |
| GOTERM_BP_FAT | metal ion-binding site:Zinc; via amide nitrogen and carbonyl oxygen; shared with metalloproteinase partner | 2  | 0.3367   | 0.011254 | TIMP2, TIMP1                                                                                                                                                                                                             | 55 | 4    | 19113 | 173.7545455 | 0.975854387 | 0.412541908 | 14.21883 |
| GOTERM_BP_FAT | GO:0032535~regulation of cellular component size                                                           | 5  | 0.841751 | 0.017635 | CORO1A, TP53, SPTBN2, VILL, NEBL                                                                                                                                                                                         | 51 | 271  | 13528 | 4.894001881 | 0.999999293 | 0.44573532  | 23.88565 |
| GOTERM_BP_FAT | GO:0040012~regulation of locomotion                                                                        | 4  | 0.673401 | 0.033887 | EGFR, CORO1A, RRAS, TPM1                                                                                                                                                                                                 | 51 | 192  | 13528 | 5.526143791 | 1           | 0.54345107  | 41.0714  |
| GOTERM_BP_FAT | GO:0007167~enzyme linked receptor protein signaling pathway                                                | 5  | 0.841751 | 0.03718  | EGFR, MET, AXL, SRC, SYK                                                                                                                                                                                                 | 51 | 342  | 13528 | 3.877995643 | 1           | 0.547818369 | 44.07798 |
| GOTERM_BP_FAT | GO:0046777~protein amino acid autophosphorylation                                                          | 3  | 0.505051 | 0.039344 | EGFR, MET, SYK                                                                                                                                                                                                           | 51 | 85   | 13528 | 9.361937716 | 1           | 0.550119758 | 45.97565 |
| GOTERM_CC_FAT | GO:0015629~actin cytoskeleton                                                                              | 13 | 2.188552 | 5.77E-10 | ABLIM1, CTNNAL1, WASF1, FSCN1, WASF2, CDH1, TPM1, VILL, MYL9, CORO1A, SMTN, TNNT1, SPTBN2                                                                                                                                | 53 | 269  | 12782 | 11.65504664 | 1.09E-07    | 1.09E-07    | 7.16E-07 |
| GOTERM_CC_FAT | GO:0005856~cytoskeleton                                                                                    | 20 | 3.367003 | 8.86E-07 | ABLIM1, CTNNAL1, WASF1, VIM, FSCN1, WASF2, CDH1, TPM1, VILL, MYL9, KIF2C, CORO1A, CTTN, TNNT1, SMTN, SPRR1A, SPRR1B, SPTBN2, CDC42EP4, KIF20A                                                                            | 53 | 1381 | 12782 | 3.492683727 | 1.67E-04    | 8.37E-05    | 0.0011   |
| GOTERM_CC_FAT | Proto-oncogene                                                                                             | 5  | 0.841751 | 0.003945 | EGFR, MET, AXL, ECT2, SRC                                                                                                                                                                                                | 55 | 230  | 19235 | 7.602766798 | 0.427279987 | 0.039029251 | 4.562487 |
| GOTERM_CC_FAT | SM00219:TyrKc                                                                                              | 5  | 0.841751 | 0.001158 | EGFR, MET, AXL, SRC, SYK                                                                                                                                                                                                 | 37 | 118  | 9079  | 10.39738891 | 0.043091882 | 0.043091882 | 1.042101 |
| GOTERM_CC_FAT | phosphoprotein                                                                                             | 31 | 5.218855 | 0.005851 | ABLIM1, CTNNAL1, AP1M2, MARCKSL1, VIM, WASF2, CDH1, AMOTL2, SRC, MYL9, KIF2C, CTTN, CDC42EP4, SYK, MUC1, EGFR, CKAP4, FSCN1, MET, AXL, TP53, ECT2, CORO1A, SMTN, TNNT1, VAMP8, SPTBN2, ADAM12, RAB11FIP1, ADAM15, KIF20A | 55 | 7263 | 19235 | 1.492708998 | 0.562791134 | 0.044923244 | 6.697131 |
| GOTERM_CC_FAT | hsa05218:Melanoma                                                                                          | 4  | 0.673401 | 0.003781 | EGFR, MET, TP53, CDH1                                                                                                                                                                                                    | 24 | 71   | 5085  | 11.93661972 | 0.175693951 | 0.062374315 | 3.598633 |
| GOTERM_CC_FAT | muscle protein                                                                                             | 3  | 0.505051 | 0.012339 | TNNT1, TPM1, MYL9                                                                                                                                                                                                        | 55 | 60   | 19235 | 17.48636364 | 0.826336121 | 0.079983343 | 13.64275 |
| GOTERM_CC_FAT | cytoplasm                                                                                                  | 17 | 2.861953 | 0.017909 | ABLIM1, CTNNAL1, MUC1, WASF1, FSCN1, WASF2, TP53, TPM1, KIF2C, CORO1A, CTTN, SMTN, TRAK2, SPRR1A, SPRR1B, SPTBN2, CDC42EP4                                                                                               | 55 | 3332 | 19235 | 1.78432282  | 0.921763999 | 0.104867665 | 19.22375 |
| GOTERM_CC_FAT | hsa04810:Regulation of actin cytoskeleton                                                                  | 5  | 0.841751 | 0.014612 | EGFR, WASF1, WASF2, RRAS, MYL9                                                                                                                                                                                           | 24 | 215  | 5085  | 4.927325581 | 0.52798034  | 0.117611144 | 13.27288 |
| GOTERM_CC_FAT | GO:0051015~actin filament binding                                                                          | 3  | 0.505051 | 0.014471 | EGFR, CORO1A, FSCN1                                                                                                                                                                                                      | 46 | 53   | 12983 | 15.97579984 | 0.812942718 | 0.120981435 | 15.29897 |
| GOTERM_CC_FAT | GO:0010576~metalloenzyme regulator activity                                                                | 2  | 0.3367   | 0.034137 | TIMP2, TIMP1                                                                                                                                                                                                             | 46 | 10   | 12983 | 56.44782609 | 0.981579527 | 0.220921358 | 32.67489 |
| GOTERM_CC_FAT | GO:0031410~cytoplasmic vesicle                                                                             | 8  | 1.346801 | 0.014619 | EGFR, LAMP1, CORO1A, LAMP2, AP1M2, RAB11A, RAB11FIP1, TIMP1                                                                                                                                                              | 53 | 642  | 12782 | 3.005231294 | 0.93817305  | 0.242961821 | 16.713   |
| GOTERM_CC_FAT | PIRSF001636:metalloproteinase inhibitor                                                                    | 2  | 0.3367   | 0.01613  | TIMP2, TIMP1                                                                                                                                                                                                             | 31 | 4    | 7396  | 119.2903226 | 0.460940276 | 0.265793133 | 13.66705 |
| GOTERM_CC_FAT | GO:0031982~vesicle                                                                                         | 8  | 1.346801 | 0.018097 | EGFR, LAMP1, CORO1A, LAMP2, AP1M2, RAB11A, RAB11FIP1, TIMP1                                                                                                                                                              | 53 | 670  | 12782 | 2.879639538 | 0.968307069 | 0.269325661 | 20.29064 |
| GOTERM_CC_FAT | GO:0012506~vesicle membrane                                                                                | 4  | 0.673401 | 0.023428 | EGFR, CORO1A, LAMP2, RAB11FIP1                                                                                                                                                                                           | 53 | 151  | 12782 | 6.388604273 | 0.98867225  | 0.273876888 | 25.5007  |
| GOTERM_CC_FAT | GO:0042995~cell projection                                                                                 | 8  | 1.346801 | 0.021974 | CORO1A, CTTN, WASF1, MET, WASF2, VIM, FSCN1, TPM1                                                                                                                                                                        | 53 | 697  | 12782 | 2.768089656 | 0.984995464 | 0.276048574 | 24.112   |
| GOTERM_CC_FAT | propeptide:Removed in mature form                                                                          | 5  | 0.841751 | 0.003973 | RND3, RRAS, RAB11A, RAB25, RHOD                                                                                                                                                                                          | 55 | 229  | 19113 | 7.587534736 | 0.730089761 | 0.279216494 | 5.251371 |
| GOTERM_CC_FAT | region of interest:First luminal domain                                                                    | 2  | 0.3367   | 0.005643 | LAMP1, LAMP2                                                                                                                                                                                                             | 55 | 2    | 19113 | 347.5090909 | 0.844596254 | 0.310884058 | 7.381503 |
| GOTERM_CC_FAT | IPR003128:Villin headpiece                                                                                 | 2  | 0.3367   | 0.025175 | ABLIM1, VILL                                                                                                                                                                                                             | 54 | 8    | 16659 | 77.125      | 0.972543935 | 0.329319984 | 26.00868 |
| GOTERM_CC_FAT | PIRSF038481:Wiskott-Aldrich syndrome proteins                                                              | 2  | 0.3367   | 0.012121 | WASF1, WASF2                                                                                                                                                                                                             | 31 | 3    | 7396  | 159.0537634 | 0.370868686 | 0.370868686 | 10.43555 |
| GOTERM_CC_FAT | IPR006025:Peptidase M, neutral zinc metallopeptidases, zinc-binding site                                   | 3  | 0.505051 | 0.037445 | MMP7, ADAM12, ADAM15                                                                                                                                                                                                     | 54 | 96   | 16659 | 9.640625    | 0.99539746  | 0.41615206  | 36.29208 |
| GOTERM_CC_FAT | GO:0044057~regulation of system process                                                                    | 5  | 0.841751 | 0.027003 | EGFR, TNNT1, RAB11A, TPM1, MYL9                                                                                                                                                                                          | 51 | 309  | 13528 | 4.292150517 | 1           | 0.483303843 | 34.29    |
| GOTERM_CC_FAT | GO:0051674~localization of cell                                                                            | 5  | 0.841751 | 0.026448 | CORO1A, MET, WASF2, SRC, SYK                                                                                                                                                                                             | 51 | 307  | 13528 | 4.32011241  | 0.999999999 | 0.486626927 | 33.71279 |
| GOTERM_MF_FAT | GO:0003779~actin binding                                                                                   | 11 | 1.851852 | 1.27E-07 | EGFR, ABLIM1, CORO1A, SMTN, WASF1, WASF2, FSCN1, SPTBN2, TPM1, VILL, NEBL                                                                                                                                                | 46 | 326  | 12983 | 9.523406242 | 1.46E-05    | 1.46E-05    | 1.45E-04 |
| GOTERM_MF_FAT | actin-binding                                                                                              | 9  | 1.515152 | 4.13E-07 | ABLIM1, CORO1A, WASF1, WASF2, FSCN1, SPTBN2, TPM1, VILL, NEBL                                                                                                                                                            | 55 | 247  | 19235 | 12.74309901 | 5.82E-05    | 5.82E-05    | 4.87E-04 |

Table S 3

|               |                                                             |    |          |          |                                                                                                                                                                      |    |      |       |             |             |             |          |
|---------------|-------------------------------------------------------------|----|----------|----------|----------------------------------------------------------------------------------------------------------------------------------------------------------------------|----|------|-------|-------------|-------------|-------------|----------|
| GOTERM_MF_FAT | GO:0007010~cytoskeleton organization                        | 10 | 1.683502 | 2.67E-05 | ABLIM1, CXCL1, KIF2C, RND3, CORO1A, WASF1, WASF2, FSCN1, TPM1, VILL                                                                                                  | 51 | 436  | 13528 | 6.083828027 | 0.021066885 | 0.010589511 | 0.041024 |
| GOTERM_MF_FAT | GO:0007264~small GTPase mediated signal transduction        | 9  | 1.515152 | 1.44E-05 | RND3, WASF2, RRAS, RAB11A, RAB25, RHOD, CDC42EP4, RAB20, SRC                                                                                                         | 51 | 305  | 13528 | 7.827193828 | 0.01135783  | 0.01135783  | 0.022011 |
| GOTERM_MF_FAT | phosphotransferase                                          | 5  | 0.841751 | 0.002433 | EGFR, MET, AXL, SRC, SYK                                                                                                                                             | 55 | 201  | 19235 | 8.699683401 | 0.290743791 | 0.0282223   | 2.837319 |
| GOTERM_MF_FAT | erythropoiesis                                              | 2  | 0.3367   | 0.005607 | TIMP2, TIMP1                                                                                                                                                         | 55 | 2    | 19235 | 349.7272727 | 0.547431357 | 0.045565466 | 6.426817 |
| GOTERM_MF_FAT | GO:0007265~Ras protein signal transduction                  | 5  | 0.841751 | 6.00E-04 | WASF2, RRAS, RHOD, CDC42EP4, SRC                                                                                                                                     | 51 | 105  | 13528 | 12.63118581 | 0.379731314 | 0.057953193 | 0.916178 |
| GOTERM_MF_FAT | GO:0022610~biological adhesion                              | 10 | 1.683502 | 9.47E-04 | EGFR, CTNNA1, RND3, CORO1A, PCDH9, CDH1, ADAM12, SRC, ADAM15, SYK                                                                                                    | 51 | 701  | 13528 | 3.783950099 | 0.529582578 | 0.072640042 | 1.442804 |
| GOTERM_MF_FAT | GO:0016192~vesicle-mediated transport                       | 9  | 1.515152 | 0.001137 | CORO1A, AP1M2, VAMP8, MARCKSL1, WASF2, SPTBN2, SRC, KIF20A, RHOBTB3                                                                                                  | 51 | 576  | 13528 | 4.144607843 | 0.595548594 | 0.072660279 | 1.729353 |
| GOTERM_MF_FAT | protein transport                                           | 6  | 1.010101 | 0.011449 | AP1M2, RAB11A, RAB25, RAB11FIP1, RAB20, KIF20A                                                                                                                       | 55 | 485  | 19235 | 4.326522962 | 0.802829231 | 0.077976211 | 12.71932 |
| GOTERM_MF_FAT | GO:0030832~regulation of actin filament length              | 4  | 0.673401 | 0.001614 | CORO1A, SPTBN2, VILL, NEBL                                                                                                                                           | 51 | 63   | 13528 | 16.84158108 | 0.723602239 | 0.087758955 | 2.447666 |
| GOTERM_MF_FAT | golgi apparatus                                             | 6  | 1.010101 | 0.024256 | RND3, AP1M2, GPER, RAB20, KIF20A, RHOBTB3                                                                                                                            | 55 | 588  | 19235 | 3.56864564  | 0.968639977 | 0.129327045 | 25.17989 |
| GOTERM_MF_FAT | nucleotide phosphate-binding region:GTP                     | 6  | 1.010101 | 0.001443 | RND3, RRAS, RAB11A, RAB25, RHOD, RAB20                                                                                                                               | 55 | 295  | 19113 | 7.06798151  | 0.378178368 | 0.146463806 | 1.937839 |
| GOTERM_MF_FAT | GO:0005886~plasma membrane                                  | 25 | 4.208754 | 0.008199 | CTNNA1, AP1M2, MARCKSL1, VIM, CDH1, AMOTL2, TPM1, SRC, TRAK2, RRAS, RAB11A, RAB25, RHOD, SYK, EGFR, MUC1, GPER, FSCN1, MET, AXL, PCDH9, LAMP1, CORO1A, LAMP2, ADAM12 | 53 | 3777 | 12782 | 1.596305344 | 0.789033555 | 0.158774172 | 9.718438 |
| GOTERM_MF_FAT | GO:0008191~metalloendopeptidase inhibitor activity          | 2  | 0.3367   | 0.034137 | TIMP2, TIMP1                                                                                                                                                         | 46 | 10   | 12983 | 56.44782609 | 0.981579527 | 0.220921358 | 32.67489 |
| GOTERM_MF_FAT | GO:0030670~phagocytic vesicle membrane                      | 2  | 0.3367   | 0.024167 | CORO1A, RAB11FIP1                                                                                                                                                    | 53 | 6    | 12782 | 80.38993711 | 0.99018338  | 0.226532033 | 26.19825 |
| GOTERM_MF_FAT | GO:0030659~cytoplasmic vesicle membrane                     | 4  | 0.673401 | 0.018871 | EGFR, CORO1A, LAMP2, RAB11FIP1                                                                                                                                       | 53 | 139  | 12782 | 6.940138455 | 0.972695084 | 0.259224284 | 21.0673  |
| GOTERM_MF_FAT | GO:0016044~membrane organization                            | 6  | 1.010101 | 0.012943 | EGFR, CORO1A, AP1M2, VAMP8, WASF2, TP53                                                                                                                              | 51 | 381  | 13528 | 4.177242551 | 0.999968648 | 0.404594085 | 18.11445 |
| GOTERM_MF_FAT | GO:0016337~cell-cell adhesion                               | 5  | 0.841751 | 0.018728 | EGFR, PCDH9, CDH1, SRC, SYK                                                                                                                                          | 51 | 276  | 13528 | 4.805342427 | 0.999999709 | 0.452264811 | 25.17476 |
| GOTERM_MF_FAT | GO:0051494~negative regulation of cytoskeleton organization | 3  | 0.505051 | 0.01755  | CORO1A, SPTBN2, VILL                                                                                                                                                 | 51 | 55   | 13528 | 14.4684492  | 0.999999243 | 0.458161039 | 23.78493 |
| GOTERM_MF_FAT | GO:0015031~protein transport                                | 8  | 1.346801 | 0.021139 | AP1M2, TRAK2, TP53, RAB11A, RAB25, RAB11FIP1, RAB20, KIF20A                                                                                                          | 51 | 762  | 13528 | 2.784828367 | 0.999999959 | 0.480096902 | 27.94534 |
