# Supplementary material for: SYK Allelic Loss and the Role of Syk-Regulated Genes in Breast Cancer Survival
Source: PubMed Central journal article supplement (PMC3921124; doi:10.1371/journal.pone.0087610), 2014-02-11
Supplement: pone.0087610.s009.pdf [file pone.0087610.s009.pdf]

Table S 4

| All Immune Depleted |             |           |         |          | IDC Immune Depleted |             |           |         |          |
|---------------------|-------------|-----------|---------|----------|---------------------|-------------|-----------|---------|----------|
| Protein             | Residue     | Unaltered | Altered | p-value  | Protein             | Residue     | Unaltered | Altered | p-value  |
| AKT1/ AKT2/ AKT3    | pT308       | -0.27     | 0.07    | 0.003    | AKT1/AKT2/AKT3      | pT308       | -0.3      | 0.03    | 0.009    |
| AKT1S1              | pT246       | -0.29     | 0.04    | 0.007    | AKT1S1              | pT246       | -0.27     | 0.04    | 0.027    |
| ARAF                | pS299       | -0.28     | 0.1     | 3.07E-04 | ARAF                | pS299       | -0.26     | 0.08    | 0.002    |
| ASNS                |             | -0.5      | 0.1     | 2.96E-08 | ASNS                |             | -0.48     | 0.16    | 1.06E-07 |
| BCL2                |             | 0.37      | -0.08   | 4.49E-05 | BCL2                |             | 0.34      | -0.07   | 0.001    |
| BCL2L11             |             | 0.22      | -0.05   | 0.023    | BCL2L11             |             | 0.28      | -0.03   | 0.02     |
| CASP7               | cleavedD198 | -0.36     | -0.09   | 0.001    | CASP7               | cleavedD198 | -0.43     | -0.03   | 9.28E-06 |
| CAV1                |             | 0.21      | -0.04   | 0.045    | CAV1                |             | 0.27      | -0.1    | 0.006    |
| CCNB1               |             | -0.42     | 0.12    | 2.63E-05 | CCNB1               |             | -0.45     | 0.16    | 1.35E-05 |
| CCNE1               |             | -0.43     | 0.04    | 1.56E-06 | CCNE1               |             | -0.39     | 0.08    | 3.05E-05 |
|                     |             |           |         |          | CDH1                |             | 0.36      | 0.16    | 0.043    |
| CDH3                |             | -0.36     | 0.03    | 3.33E-04 | CDH3                |             | -0.38     | 0.06    | 5.74E-04 |
| CDK1                |             | -0.36     | 0.08    | 2.50E-04 | CDK1                |             | -0.36     | 0.08    | 7.78E-04 |
| CDKN1B              | pT198       | -0.3      | 0.01    | 0.002    | CDKN1B              | pT198       | -0.3      | 0.04    | 7.30E-04 |
|                     |             |           |         |          | CDKN1B              |             | 0.2       | -0.13   | 0.016    |
| CHEK2               | pT68        | -0.29     | 0.07    | 0.004    | CHEK2               | pT68        | -0.31     | 0.11    | 0.003    |
| CHEK2               |             | -0.2      | 0.07    | 0.023    | CHEK2               |             | -0.27     | 0.11    | 0.002    |
|                     |             |           |         |          | COL6A1              |             | 0.19      | -0.12   | 0.032    |
|                     |             |           |         |          | DVL3                |             | -0.09     | 0.16    | 0.043    |
| EEF2                |             | -0.27     | 0.07    | 0.006    | EEF2                |             | -0.32     | 0.12    | 0.002    |
| EEF2K               |             | 0.36      | -0.01   | 0.004    | EEF2K               |             | 0.32      | -0.04   | 0.011    |
| EGFR                |             | -0.3      | 0.01    | 7.23E-04 | EGFR                |             | -0.25     | -0.01   | 0.023    |
| EIF4EBP1            | pT70        | -0.34     | 0.12    | 6.25E-05 | EIF4EBP1            | pT70        | -0.39     | 0.13    | 6.68E-07 |
| EIF4EBP1            | pS65        | -0.29     | 0.06    | 0.004    | EIF4EBP1            | pS65        | -0.38     | 0.05    | 9.32E-05 |
| EIF4EBP1            | pT37        | -0.25     | 0.08    | 0.013    | EIF4EBP1            | pT37        | -0.32     | 0.07    | 0.004    |
| EIF4EBP1            |             | -0.19     | 0.09    | 0.016    | EIF4EBP1            |             | -0.22     | 0.07    | 0.015    |
| ESR1                | pS118       | 0.4       | -0.01   | 0.002    | ESR1                | pS118       | 0.37      | -0.03   | 0.003    |

Table S 4

|         |       |       |       |          |        |       |       |       |          |
|---------|-------|-------|-------|----------|--------|-------|-------|-------|----------|
| ESR1    |       | 0.54  | -0.02 | 3.13E-08 | ESR1   |       | 0.54  | -0.05 | 1.12E-07 |
| GATA3   |       | 0.56  | -0.02 | 6.98E-08 | GATA3  |       | 0.54  | -0.03 | 1.19E-06 |
| INPP4B  |       | 0.34  | 0.03  | 0.008    | INPP4B |       | 0.39  | 0.02  | 0.003    |
| IRS1    |       | 0.25  | -0.06 | 0.026    | IRS1   |       | 0.25  | -0.07 | 0.032    |
| MAP2K1  | pS217 | -0.21 | 0.05  | 0.033    | MAP2K1 | pS217 | -0.29 | 0.06  | 0.008    |
| MAPK14  |       | 0.16  | -0.12 | 0.029    |        |       |       |       |          |
| MAPK9   |       | 0.32  | -0.04 | 0.002    | MAPK9  |       | 0.28  | -0.09 | 0.005    |
| NFKB1   | pS536 | -0.29 | 0.06  | 0.006    | NFKB1  | pS536 | -0.27 | 0.11  | 0.007    |
| PARK7   |       | 0.24  | -0.08 | 0.003    | PARK7  |       | 0.18  | -0.16 | 0.006    |
| PDK1    | pS241 | 0.27  | 0.01  | 0.029    |        |       |       |       |          |
| PGR     |       | 0.43  | -0.05 | 2.13E-04 | PGR    |       | 0.41  | -0.04 | 0.001    |
| RAD50   |       | 0.32  | -0.05 | 8.17E-04 | RAD50  |       | 0.28  | -0.03 | 0.012    |
|         |       |       |       |          | RPS6   | pS235 | -0.26 | 0.06  | 0.016    |
|         |       |       |       |          | RPS6   | pS240 | -0.22 | 0.09  | 0.02     |
|         |       |       |       |          | RPS6   |       | -0.21 | 0.09  | 0.021    |
| SCD1    |       | -0.19 | 0.08  | 0.033    | SCD1   |       | -0.24 | 0.15  | 0.008    |
| SMAD3   |       | 0.25  | -0.02 | 0.037    | SMAD3  |       | 0.29  | -0.08 | 0.007    |
| SRC     | pY416 | -0.31 | 0.04  | 0.004    | SRC    | pY416 | -0.34 | 0.03  | 0.006    |
| STAT5A  |       | 0.19  | -0.1  | 0.013    | TP53   |       | -0.26 | 0.11  | 0.005    |
| TP53    |       | -0.31 | 0.08  | 0.001    |        |       |       |       |          |
| TP53BP1 |       | 0.28  | 0     | 0.024    |        |       |       |       |          |
| TSC2    |       | 0.35  | 0.01  | 0.004    | TSC2   |       | 0.33  | 0.01  | 0.017    |
